# Supplementary material
Source: Springer Nature journal article supplement (https://www.springermedizin.de/resource/supplementary/12883_2011_482_MOESM1_ESM.pdf/9455554)
Supplement: MOESM1 [file 9455554]

# Enrolment

**Eligible children:**  
all children with hemiplegic CP  
Age: 5-15 yrs  
Inclusion criteria

Clinical Evaluation  
House level

Excluded:  
◆ Not meeting inclusion criteria  
◆ Declined to participate

**T0:** 1 week before the onset of training  
AHA, MUUL, ABILHAND-Kids, fMRI\*

**Randomisation**  
House level (4-5 vs 6-8)

# Allocation

**Experimental group:**  
Action-Observation Therapy of tailored and child-oriented goal actions (15 days)  
(n= 12)

**Control group:**  
Physical practice of tailored and child-oriented goal actions (15 days)  
(n= 12)

# Follow-up

**T1:** 1 week after training  
AHA, MUUL, ABILHAND-Kids, fMRI\*

**T2:** 8 weeks after training  
AHA, MUUL, ABILHAND-Kids, fMRI\*

**T3:** 24 weeks after training  
AHA, MUUL, ABILHAND-Kids
